# Supplementary material for: Dissecting the mechanism of oxygen trafficking in a metalloenzyme
Source: Royal Society of Chemistry journal article supplement (doi:10.1039/c005054g), 2010-09-23
Supplement: c005054g.pdf [file c005054g.pdf]

# Dissecting the mechanism of oxygen trafficking in a metalloenzyme

Mark A. Smith,<sup>ab</sup> Peter F. Knowles<sup>a</sup>, Michael J. McPherson<sup>a</sup> and Arwen R. Pearson<sup>a\*</sup>

## Electronic Supplementary Data

**Table S1** Crystallographic Data Collection and Refinement

|                                    | <b>I342F<sup>b</sup></b>                      | <b>E490A<sup>c</sup></b>                      | <b>E490I<sup>b</sup></b>                      | <b>E490Q<sup>c</sup></b>                      |
|------------------------------------|-----------------------------------------------|-----------------------------------------------|-----------------------------------------------|-----------------------------------------------|
| <b>Data Collection</b>             |                                               |                                               |                                               |                                               |
| Wavelength (Å)                     | 0.9796                                        | 1.5418                                        | 1.5418                                        | 1.5418                                        |
| Space Group                        | P2 <sub>1</sub> 2 <sub>1</sub> 2 <sub>1</sub> |
| Cell dimensions, <i>a,b,c</i> (Å)  | 79.1, 133.9, 166.6                            | 80.2, 135.2, 167.6                            | 80.0, 135.4, 166.8                            | 80.1, 135.1, 167.1                            |
| Resolution (Å)                     | 45-2.30 (2.42-2.30) <sup>a</sup>              | 62.7-2.35 (2.43-2.35)                         | 51.3-2.00 (2.11-2.00)                         | 71.1-2.1 (2.2-2.1))                           |
| R <sub>merge</sub> (%)             | 10.7 (40.4)                                   | 12.4 (34.5)                                   | 5.9 (47.1)                                    | n.a <sup>d</sup>                              |
| R <sub>p.i.m.</sub> (%)            | 4.3 (16.0)                                    | n.d                                           | 3.2 (44.3)                                    | n.a                                           |
| <I>/sd</I>                         | 17.3 (4.6)                                    | 6.6 (3.2)                                     | 14.8 (1.2)                                    | n.a                                           |
| Completeness                       | 100 (100)                                     | 81.9 (83.6)                                   | 77.7 (55.7)                                   | 93.2 (65.4)                                   |
| Multiplicity                       | 7.3 (7.3)                                     | 2.75 (2.58)                                   | 3.2 (1.4)                                     | n.a                                           |
| No. reflections                    | 581275                                        | 172532                                        | 303279 (13278)                                | n.a                                           |
| No. Unique reflections             | 79344                                         | 62713                                         | 93826 (9598)                                  | 94155 (4843)                                  |
| <b>Refinement</b>                  |                                               |                                               |                                               |                                               |
| R <sub>work</sub> (%)              | 19.5 (24.7)                                   |                                               |                                               |                                               |
| R <sub>free</sub> (%)              | 24.5 (36.3)                                   |                                               |                                               |                                               |
| No. reflections in FreeR set       | 3979 (301)                                    |                                               |                                               |                                               |
| No atoms                           | 11781                                         |                                               |                                               |                                               |
| Protein                            | 11421                                         |                                               |                                               |                                               |
| Ligands                            | 33                                            |                                               |                                               |                                               |
| Water                              | 327                                           |                                               |                                               |                                               |
| Average Bfactors (Å <sup>2</sup> ) |                                               |                                               |                                               |                                               |
| Protein                            | 28.2                                          |                                               |                                               |                                               |
| Ligands                            | 29.0                                          |                                               |                                               |                                               |
| Water                              | 23.6                                          |                                               |                                               |                                               |
| r.m.s deviations                   |                                               |                                               |                                               |                                               |
| Bond lengths (Å)                   | 0.012                                         |                                               |                                               |                                               |
| Bond angles (°)                    | 1.388                                         |                                               |                                               |                                               |
| Ramachandran                       |                                               |                                               |                                               |                                               |
| Most favoured (%)                  | 100                                           |                                               |                                               |                                               |
| Outliers (%)                       | 0                                             |                                               |                                               |                                               |

<sup>a</sup> Numbers in parentheses refer to the highest resolution shell. <sup>b</sup> processed using MOSFLM/SCALA. <sup>c</sup> processed using CrystalClear. <sup>d</sup> Scaling statistics not available due to back-up disc failure.
